# Supplementary material for: Pain and Its Impact on Functional Health: 7-Year Longitudinal Findings among Middle-Aged and Older Adults in Indonesia
Source: MDPI journal article supplement (doi:10.3390/geriatrics5020039), 2020-06-22
Supplement: s1 [file s1]

**Supplementary file S1: Cross-sectional associations between pain status and functional health, IFLS 2014**

| Respondents N=7936 aged 50 years+             | Linear regression coefficients [95% Confidence Interval] <sup>1</sup> |                             |
|-----------------------------------------------|-----------------------------------------------------------------------|-----------------------------|
|                                               | Functional limitation scores                                          | Grip strength               |
| <b>Reported pain level in 2014</b>            |                                                                       |                             |
| No pain (reference)                           |                                                                       |                             |
| A little                                      | 0.43 [-0.52; 1.39]                                                    | -0.35 [-0.82; 0.12]         |
| Quite a bit                                   | <b>1.31 [0.25; 2.36]</b>                                              | <b>-0.59 [-1.04; -0.14]</b> |
| Severe                                        | <b>6.59 [5.25; 7.93]</b>                                              | <b>-1.36 [-1.94; -0.79]</b> |
| <b>Sociodemographic covariates</b>            |                                                                       |                             |
| Female (reference: male)                      | <b>1.08 [0.72; 1.44]</b>                                              | <b>-4.88 [-5.05; -4.71]</b> |
| Age (reference: 50-59 years)                  |                                                                       |                             |
| 60-69 years                                   | <b>2.30 [1.65; 2.95]</b>                                              | <b>-2.95 [-3.30; -2.61]</b> |
| 70+ years                                     | <b>12.3 [11.2; 13.5]</b>                                              | <b>-6.42 [-6.87; -5.96]</b> |
| Married (reference)                           |                                                                       |                             |
| Not married                                   | -0.94 [-3.20; 1.31]                                                   | -0.45 [-1.66; 0.76]         |
| Separated/ divorced                           | -0.38 [-1.74; 0.97]                                                   | <b>-1.09 [-1.82; -0.35]</b> |
| Widowed                                       | <b>1.69 [0.77; 2.61]</b>                                              | <b>-0.97 [-1.34; -0.61]</b> |
| Per capita expenditure: tertile 1 (lowest)    | 0.52 [-0.30; 1.33]                                                    | <b>-1.50 [-1.89; -1.11]</b> |
| Per capita expenditure: tertile 2             | 1.10 [0.25; 1.94]                                                     | -0.30 [-0.67; 0.07]         |
| Per capita expenditure: tertile 3 (reference) |                                                                       |                             |
| Education: Elementary school                  | <b>1.39 [-0.14; 2.32]</b>                                             | -0.21 [-0.92; 0.50]         |
| Education: Junior to high school              | <b>1.64 [0.28; 3.01]</b>                                              | 0.04 [-0.67; 0.07]          |
| Education: College (reference)                |                                                                       |                             |
| Jakarta                                       | 1.04 [0.27; 1.81]                                                     | <b>0.21 [-0.18; 0.60]</b>   |
| The rest of Java                              | -0.06 [-1.19; 1.08]                                                   | <b>-0.21 [-0.79; 0.37]</b>  |
| Outer islands and other                       | <b>3.28 [2.48; 4.08]</b>                                              | -0.08 [-0.41; 0.26]         |
| Sumatra province (reference)                  |                                                                       |                             |
| Rural (reference: urban)                      | 0.31 [-0.44; 1.05]                                                    | <b>-0.38 [-0.70; -0.06]</b> |
| <b>Health covariates<sup>2</sup></b>          |                                                                       |                             |
| Depression score (CES-D ≥10) <sup>3</sup>     | <b>4.58 [3.78; 5.37]</b>                                              | <b>-0.83 [-1.29; -0.36]</b> |
| Chronic conditions in 2014 <sup>3</sup>       | <b>1.97 [0.95; 3.00]</b>                                              | <b>-0.85 [-1.19; -0.52]</b> |
| <i>Model adjusted R<sup>2</sup></i>           | <i>0.26</i>                                                           | <i>0.54</i>                 |

<sup>1</sup>Final model includes sociodemographic variables, health covariates, and pain variables. Bolded values were statistically significant at p<0.05.

<sup>2</sup>Based on the Center for Epidemiologic Studies Depression Scale (CES-D), scores of ≥10 classified as having depressive symptoms.

<sup>3</sup>Respondents who reported taking medication on a weekly basis in 2014 for at least one of these chronic conditions: tuberculosis and other lung conditions, heart problems, stroke, cancer, arthritis, kidney diseases, and digestive conditions.
